# Supplementary material
Source: publisher figshare collection journal article supplement (https://acs.figshare.com/ndownloader/files/4030354)
Supplement: Supplementary file 1 [file 4030354]

**Study of the transition metal ordering in layered  $\text{Na}_x\text{Ni}_{x/2}\text{Mn}_{1-x/2}\text{O}_2$  ( $2/3 \leq x \leq 1$ ) and consequences of Na/Li exchange**

Jordi Cabana,<sup>a, b, \*</sup> Natasha A. Chernova,<sup>c</sup> Jie Xiao,<sup>c</sup> Megan Roppolo,<sup>c</sup> Kellie A. Aldi,<sup>a</sup> M. Stanley Whittingham<sup>c</sup> and Clare P. Grey<sup>a, d, \*</sup>

<sup>a</sup>: Department of Chemistry, State University of New York at Stony Brook, Stony Brook, NY 11794-3400, USA.

<sup>b</sup>: Environmental Energy Technologies Division, Lawrence Berkeley National Laboratory, 1 Cyclotron Road MS62R0203, Berkeley, CA 94720, USA.

<sup>c</sup>: Institute for Materials Research, State University of New York at Binghamton, Binghamton, NY 13902-6000, USA.

<sup>d</sup>: Department of Chemistry, University of Cambridge, Cambridge CB2 1EW, UK

\*: [jcabana@lbl.gov](mailto:jcabana@lbl.gov), [cpg27@cam.ac.uk](mailto:cpg27@cam.ac.uk)

**Supporting Information**

**Figure S1:**  $^{23}\text{Na}$  MAS NMR spectra of all phase pure  $\text{Na}_x\text{Ni}_{x/2}\text{Mn}_{1-x/2}\text{O}_2$  prepared in this study, acquired at a spinning speed of 38 kHz, normalized to the amount of sample in the rotor. The “\*” indicates the spinning sidebands for the main centerband. The peaks marked with “+” correspond to the isotropic resonance for a diamagnetic impurity, most likely  $\text{Na}_2\text{CO}_3$ , at around 0 ppm, and its spinning sidebands.

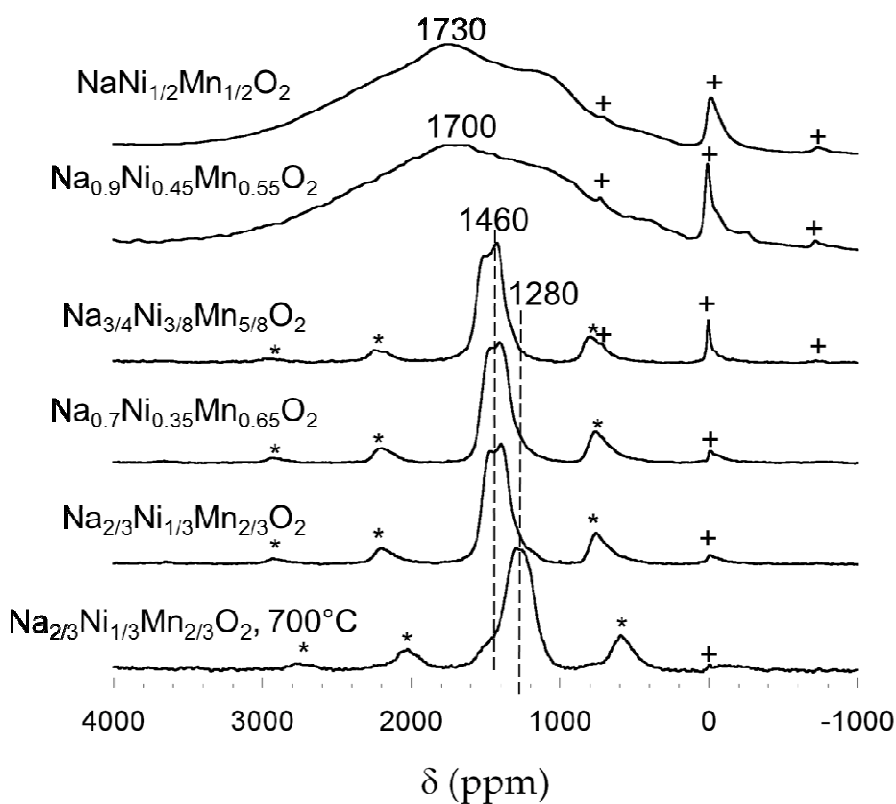

**Figure S2:** Simulation of the quadrupolar broadening of the central transition in the  $^{23}\text{Na}$  MAS NMR spectrum of a) P2- and b) P3- $\text{Na}_{2/3}\text{Ni}_{1/3}\text{Mn}_{2/3}\text{O}_2$  using the minimum number of resonances.

Modeling of the  $^{23}\text{Na}$  NMR spectra was performed using the program WinSolids1 by K. Eichele.<sup>1</sup> Values for quadrupolar coupling constant ( $\chi_{\text{QC}}$ ), the asymmetry parameter ( $\eta$ ), and the isotropic shift ( $\delta_{\text{iso}}$ ) were refined. The best fits were obtained with 100% Lorentzian and 50%-50% Lorentzian-Gaussian functions for the P2 and P3 polytypes, respectively.

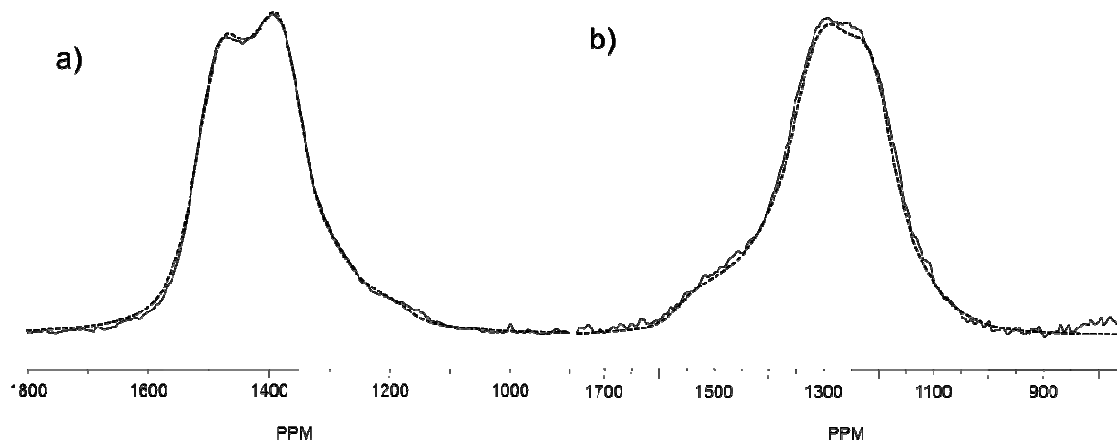

1. Eichele, K. *WSolids1*, Universität Tübingen (Germany), 2001. <http://anorganik.uni-tuebingen.de/klaus/soft/index.php?p=wsolids1/wsolids1>.

**Table S1.** Results of the fits of the central transition in the  $^{23}\text{Na}$  MAS NMR spectra of P2- and P3- $\text{Na}_{2/3}\text{Ni}_{1/3}\text{Mn}_{2/3}\text{O}_2$ , using quadrupolar broadening and the minimum number of peaks. See Figure S2 for visualization of the fits. These results are only meant to illustrate that the complexity of the signals requires more than one peak in the fits.

| Polytype | Environment | Rel. Intensity | $d_{\text{iso}}$ (ppm) | $\chi_{\text{QC}}$ (MHz) | h   |
|----------|-------------|----------------|------------------------|--------------------------|-----|
| P2       | A           | 1              | 1543                   | 3.5                      | 0.3 |
|          | B           | 0.5            | 1560                   | 3.9                      | 1.0 |
| P3       | A           | 1              | 1370                   | 3.5                      | 0.4 |
|          | B           | 0.2            | 1400                   | 3.9                      | 0.9 |
|          | C           | 0.6            | 1575                   | 4.4                      | 0.7 |
